# Supplementary material for: Clot patterns determined by DSA and CTA can help predict intracranial atherosclerotic stenosis in acute ischemic stroke patients
Source: Frontiers journal article supplement (doi:10.3389/fneur.2024.1395764), 2024-07-24
Supplement: Data_Sheet_1.PDF [file Data_Sheet_1.PDF]

# 1. Flowchart of this study

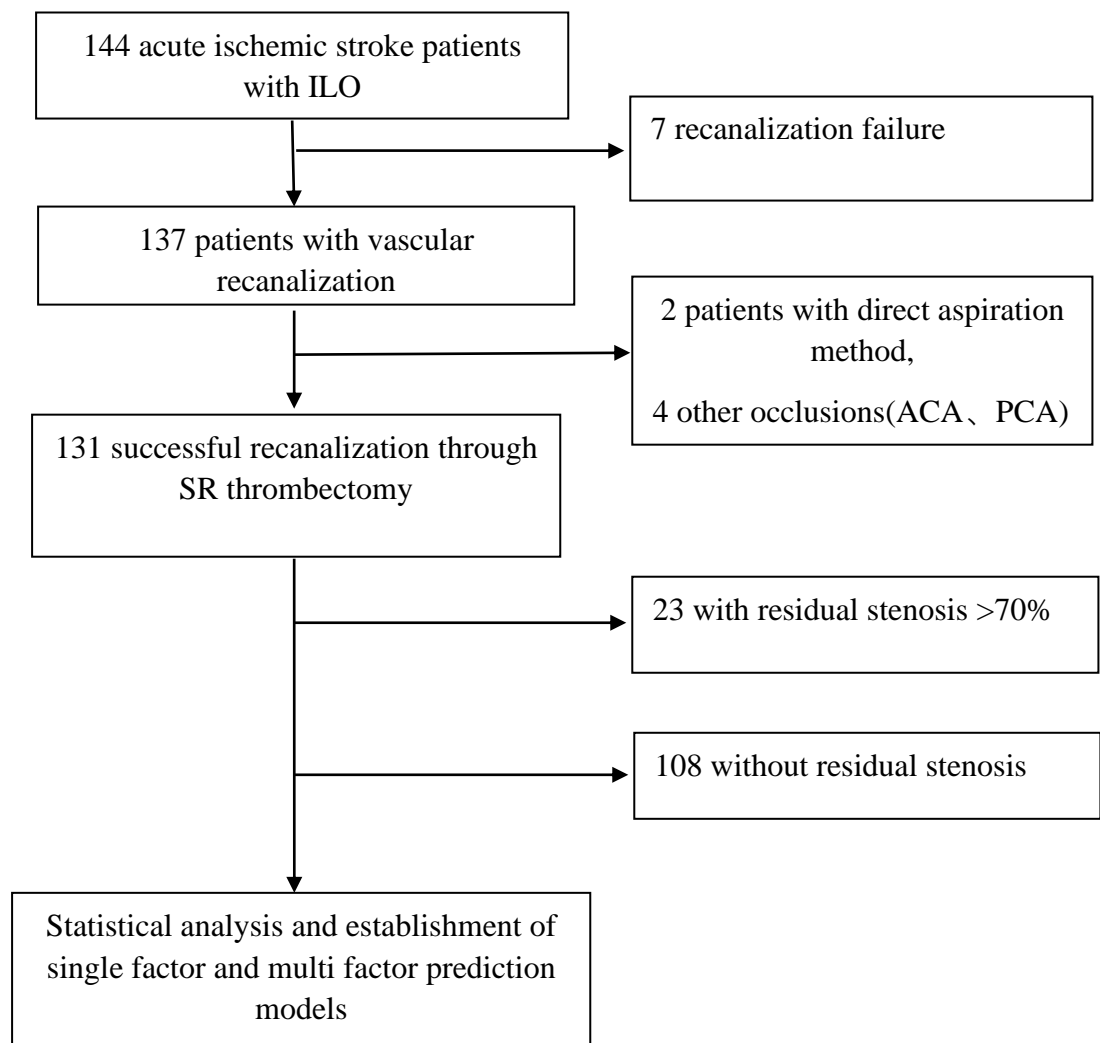

## 2 . dichotomize age, onset to door, The results are as follows:64.5 and 5.3

```
. cutpt residualste0sisafterthrombectm age, near
```

Empirical cutpoint estimation

|                                   |                                               |
|-----------------------------------|-----------------------------------------------|
| Method:                           | Nearest to (0,1)                              |
| Reference variable:               | residualste0sisafterthrombectm (0=neg, 1=pos) |
| Classification variable:          | age                                           |
| Empirical optimal cutpoint:       | 64.5                                          |
| Sensitivity at cutpoint:          | 0.57                                          |
| Specificity at cutpoint:          | 0.34                                          |
| Area under ROC curve at cutpoint: | 0.45                                          |

```
. cutpt residualste0sisafterthrombectm onsettodoor_hour, near
```

Empirical cutpoint estimation

|                                   |                                               |
|-----------------------------------|-----------------------------------------------|
| Method:                           | Nearest to (0,1)                              |
| Reference variable:               | residualste0sisafterthrombectm (0=neg, 1=pos) |
| Classification variable:          | onsettodoor_hour                              |
| Empirical optimal cutpoint:       | 5.3083334                                     |
| Sensitivity at cutpoint:          | 0.70                                          |
| Specificity at cutpoint:          | 0.72                                          |
| Area under ROC curve at cutpoint: | 0.71                                          |

## 3 . Predicting variables: Clot pattern, LAA, age (>65 vs. <65), onset to door (>5 vs. <5 hours)

or onset to door (>6 vs. <6 hours)

1) Interpretation: for patients with age > 65, presenting >5 hours from stroke onset, toast classified as LAA, and clot topography showing wedge shape, their stroke episodes are most likely caused by ICAS

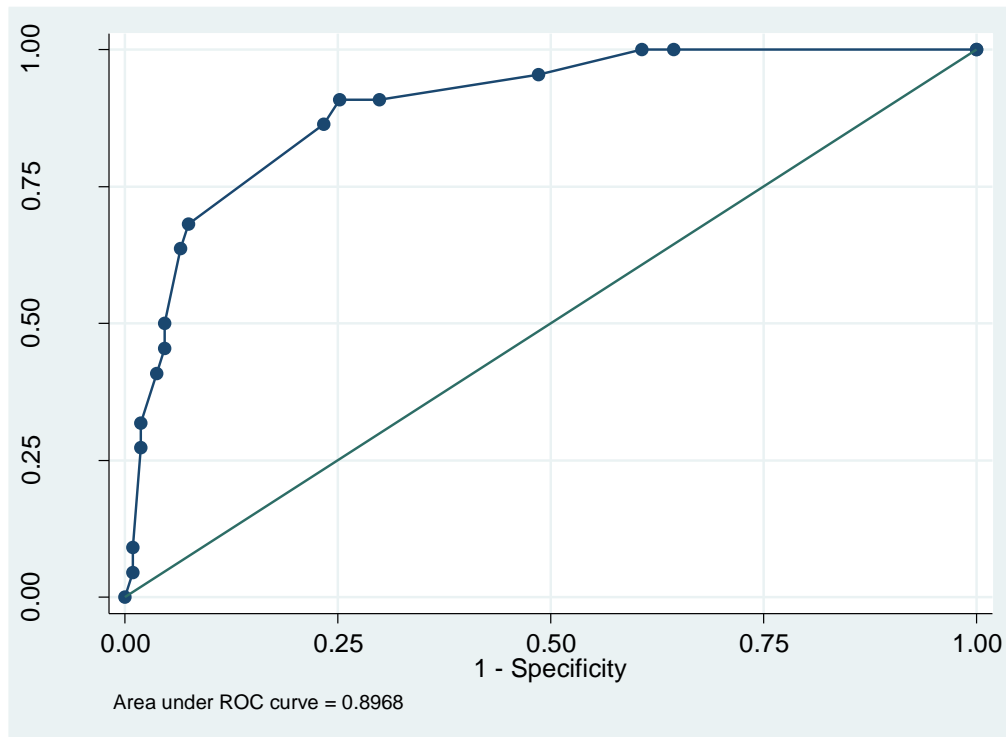

2) Interpretation: for patients with age > 65, presenting >6 hours from stroke onset, toast classified as LAA, and clot pattern showing tapered sign.

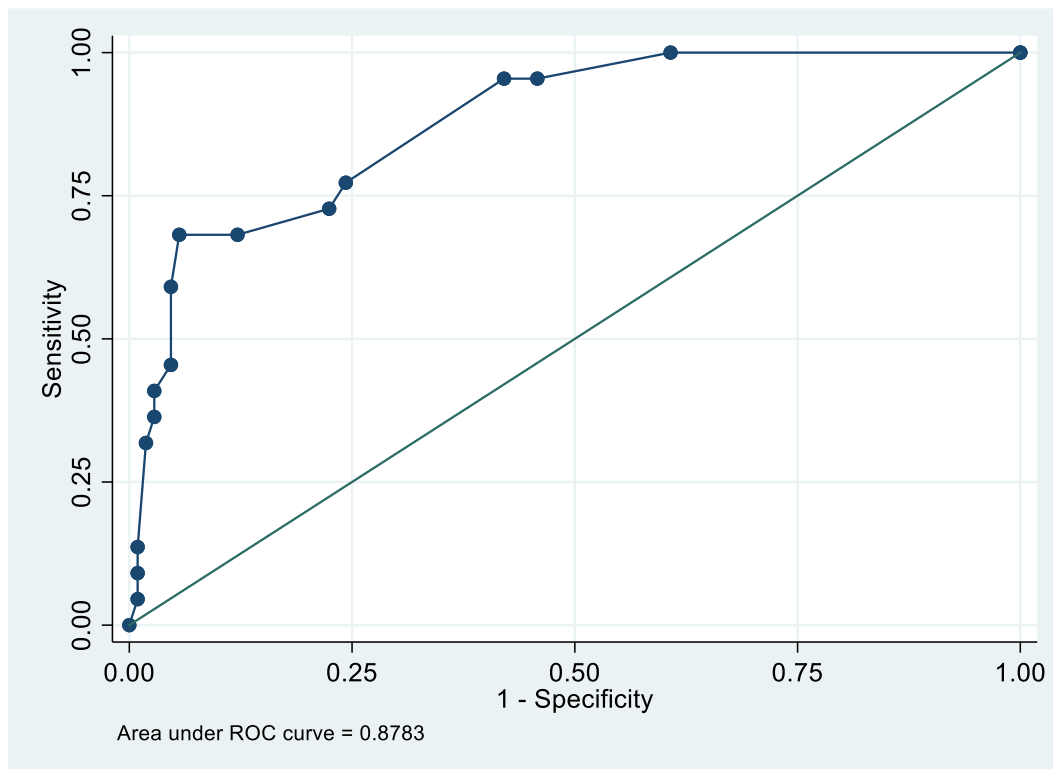

4 . The relationship between various factor and residual stenosis (according to simple logistic regression analysis)

| variables             | OR    | P     | 95% CI |       |
|-----------------------|-------|-------|--------|-------|
| LAA                   | 6.27  | 0.000 | 2.37   | 16.63 |
| Clot pattern          | 20.60 | 0.000 | 6.36   | 66.74 |
| age                   | 0.97  | 0.063 | 0.94   | 1.00  |
| Onset-to-door<br>hour | 1.24  | 0.001 | 1.10   | 1.39  |
| smoking               | 0.65  | 0.373 | 0.25   | 1.68  |
| hypertension          | 0.83  | 0.700 | 0.33   | 2.09  |
| hypercholesteremia    | 1.00  | 0.929 | 0.98   | 1.02  |
| diabetes              | 0.77  | 0.678 | 0.23   | 2.59  |
| occlusion sites       | 0.80  | 0.711 | 0.25   | 2.57  |
